# Supplementary material for: Evaluation of tangential flow filtration coupled to long-read sequencing for ostreid herpesvirus type 1 genome assembly
Source: PubMed Central journal article supplement (PMC9836095; doi:10.1099/mgen.0.000895), 2022-11-10
Supplement: mgen-8-895-s001.pdf [file mgen-8-895-s001.pdf]

# Figure Suppl 1

**A**

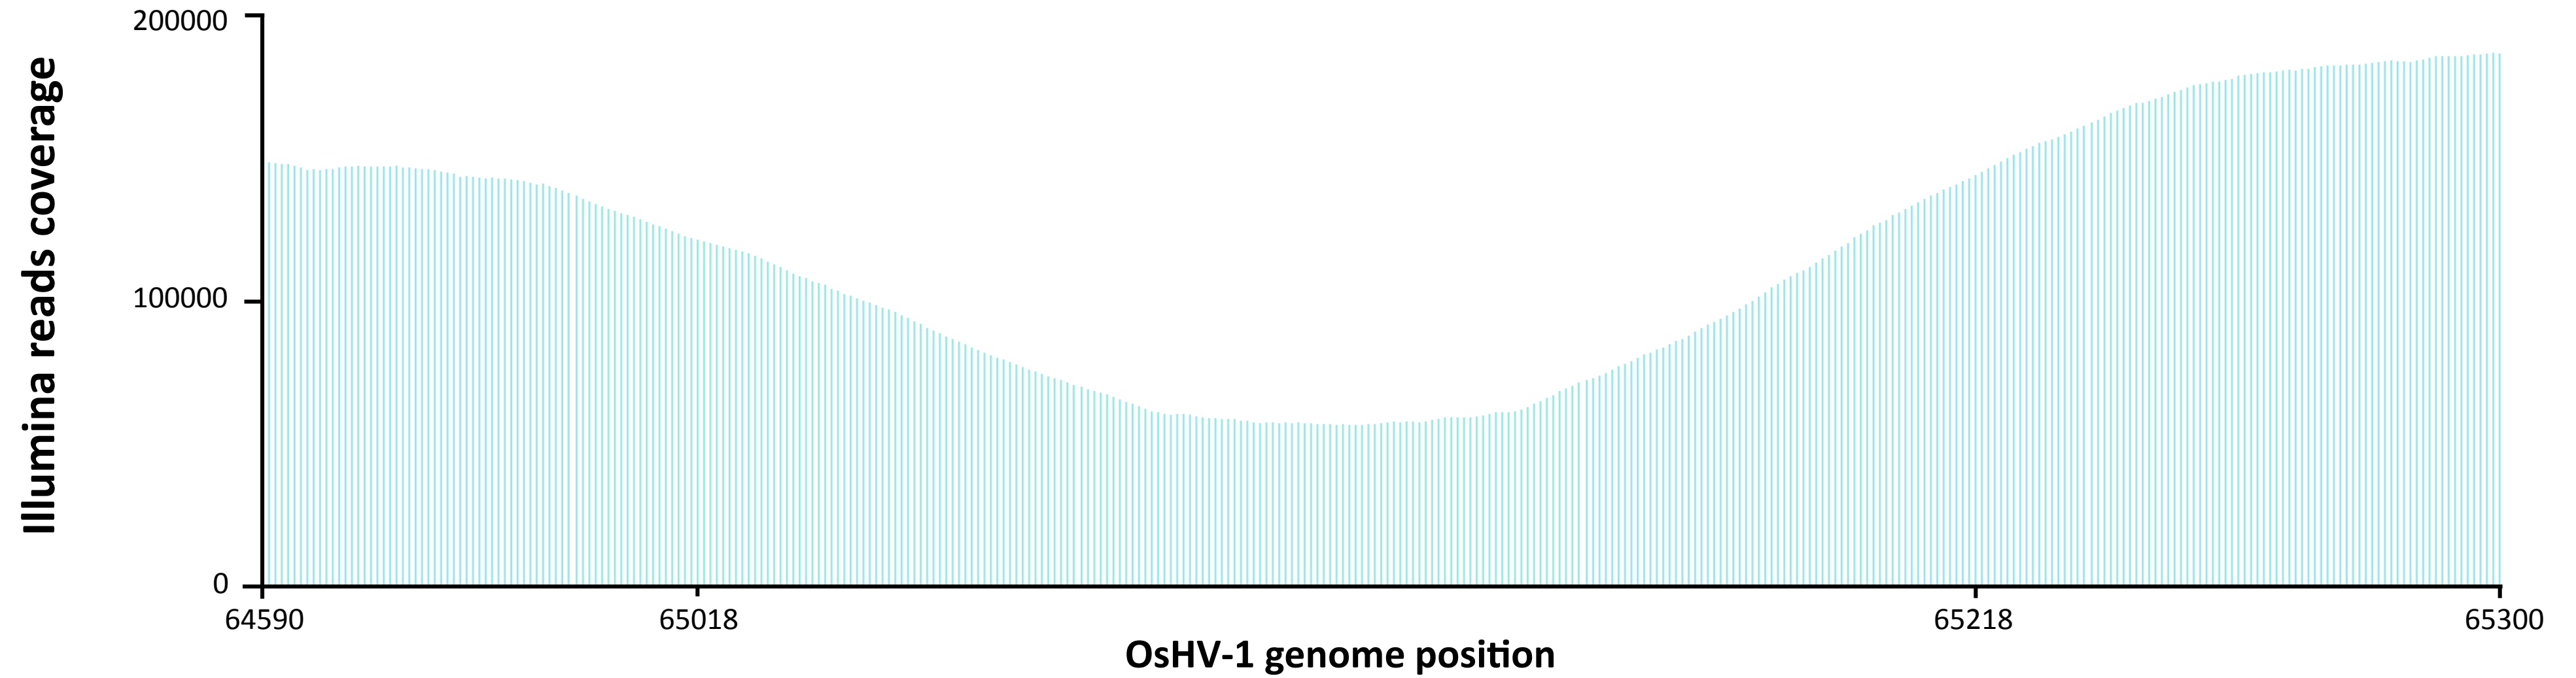

**B**

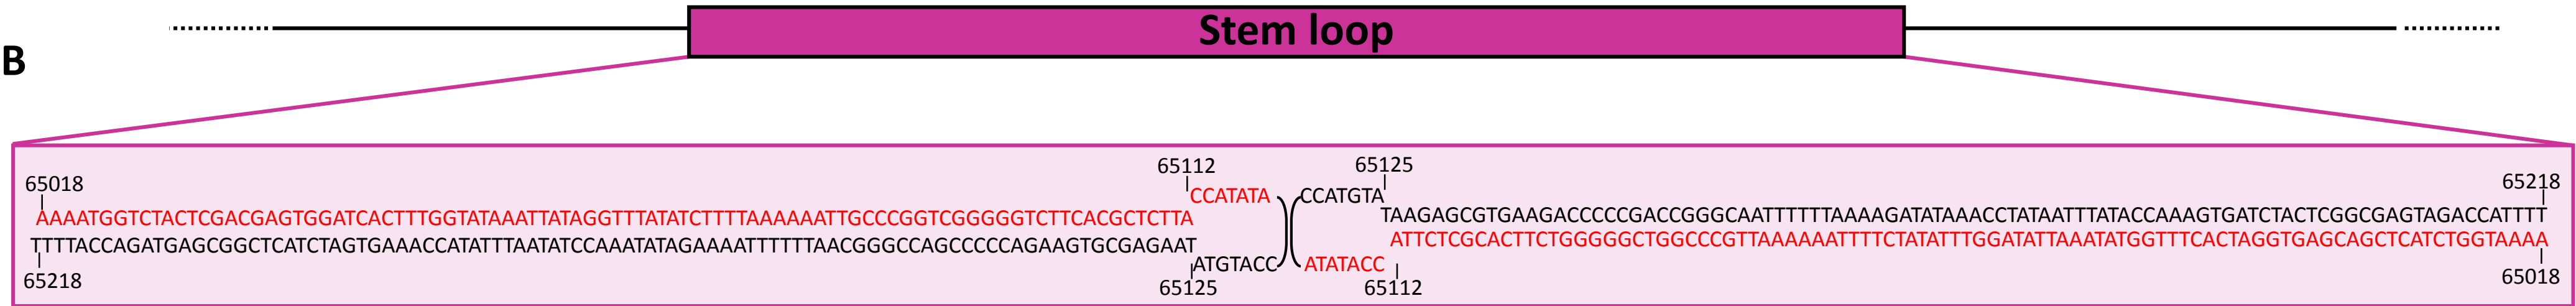

**Figure Suppl 1: Read coverage analysis in the stem-loop region of the Illumina OsHV-1 NR genome.**

(A) Illumina short-read coverage between position 64590 and 65300.

(B) Schematic representation of the palindromic region inside the stem-loop. Sequence color-coded in red correspond to the complementary strand forming the stem-loop.

# Figure Suppl 2

## A

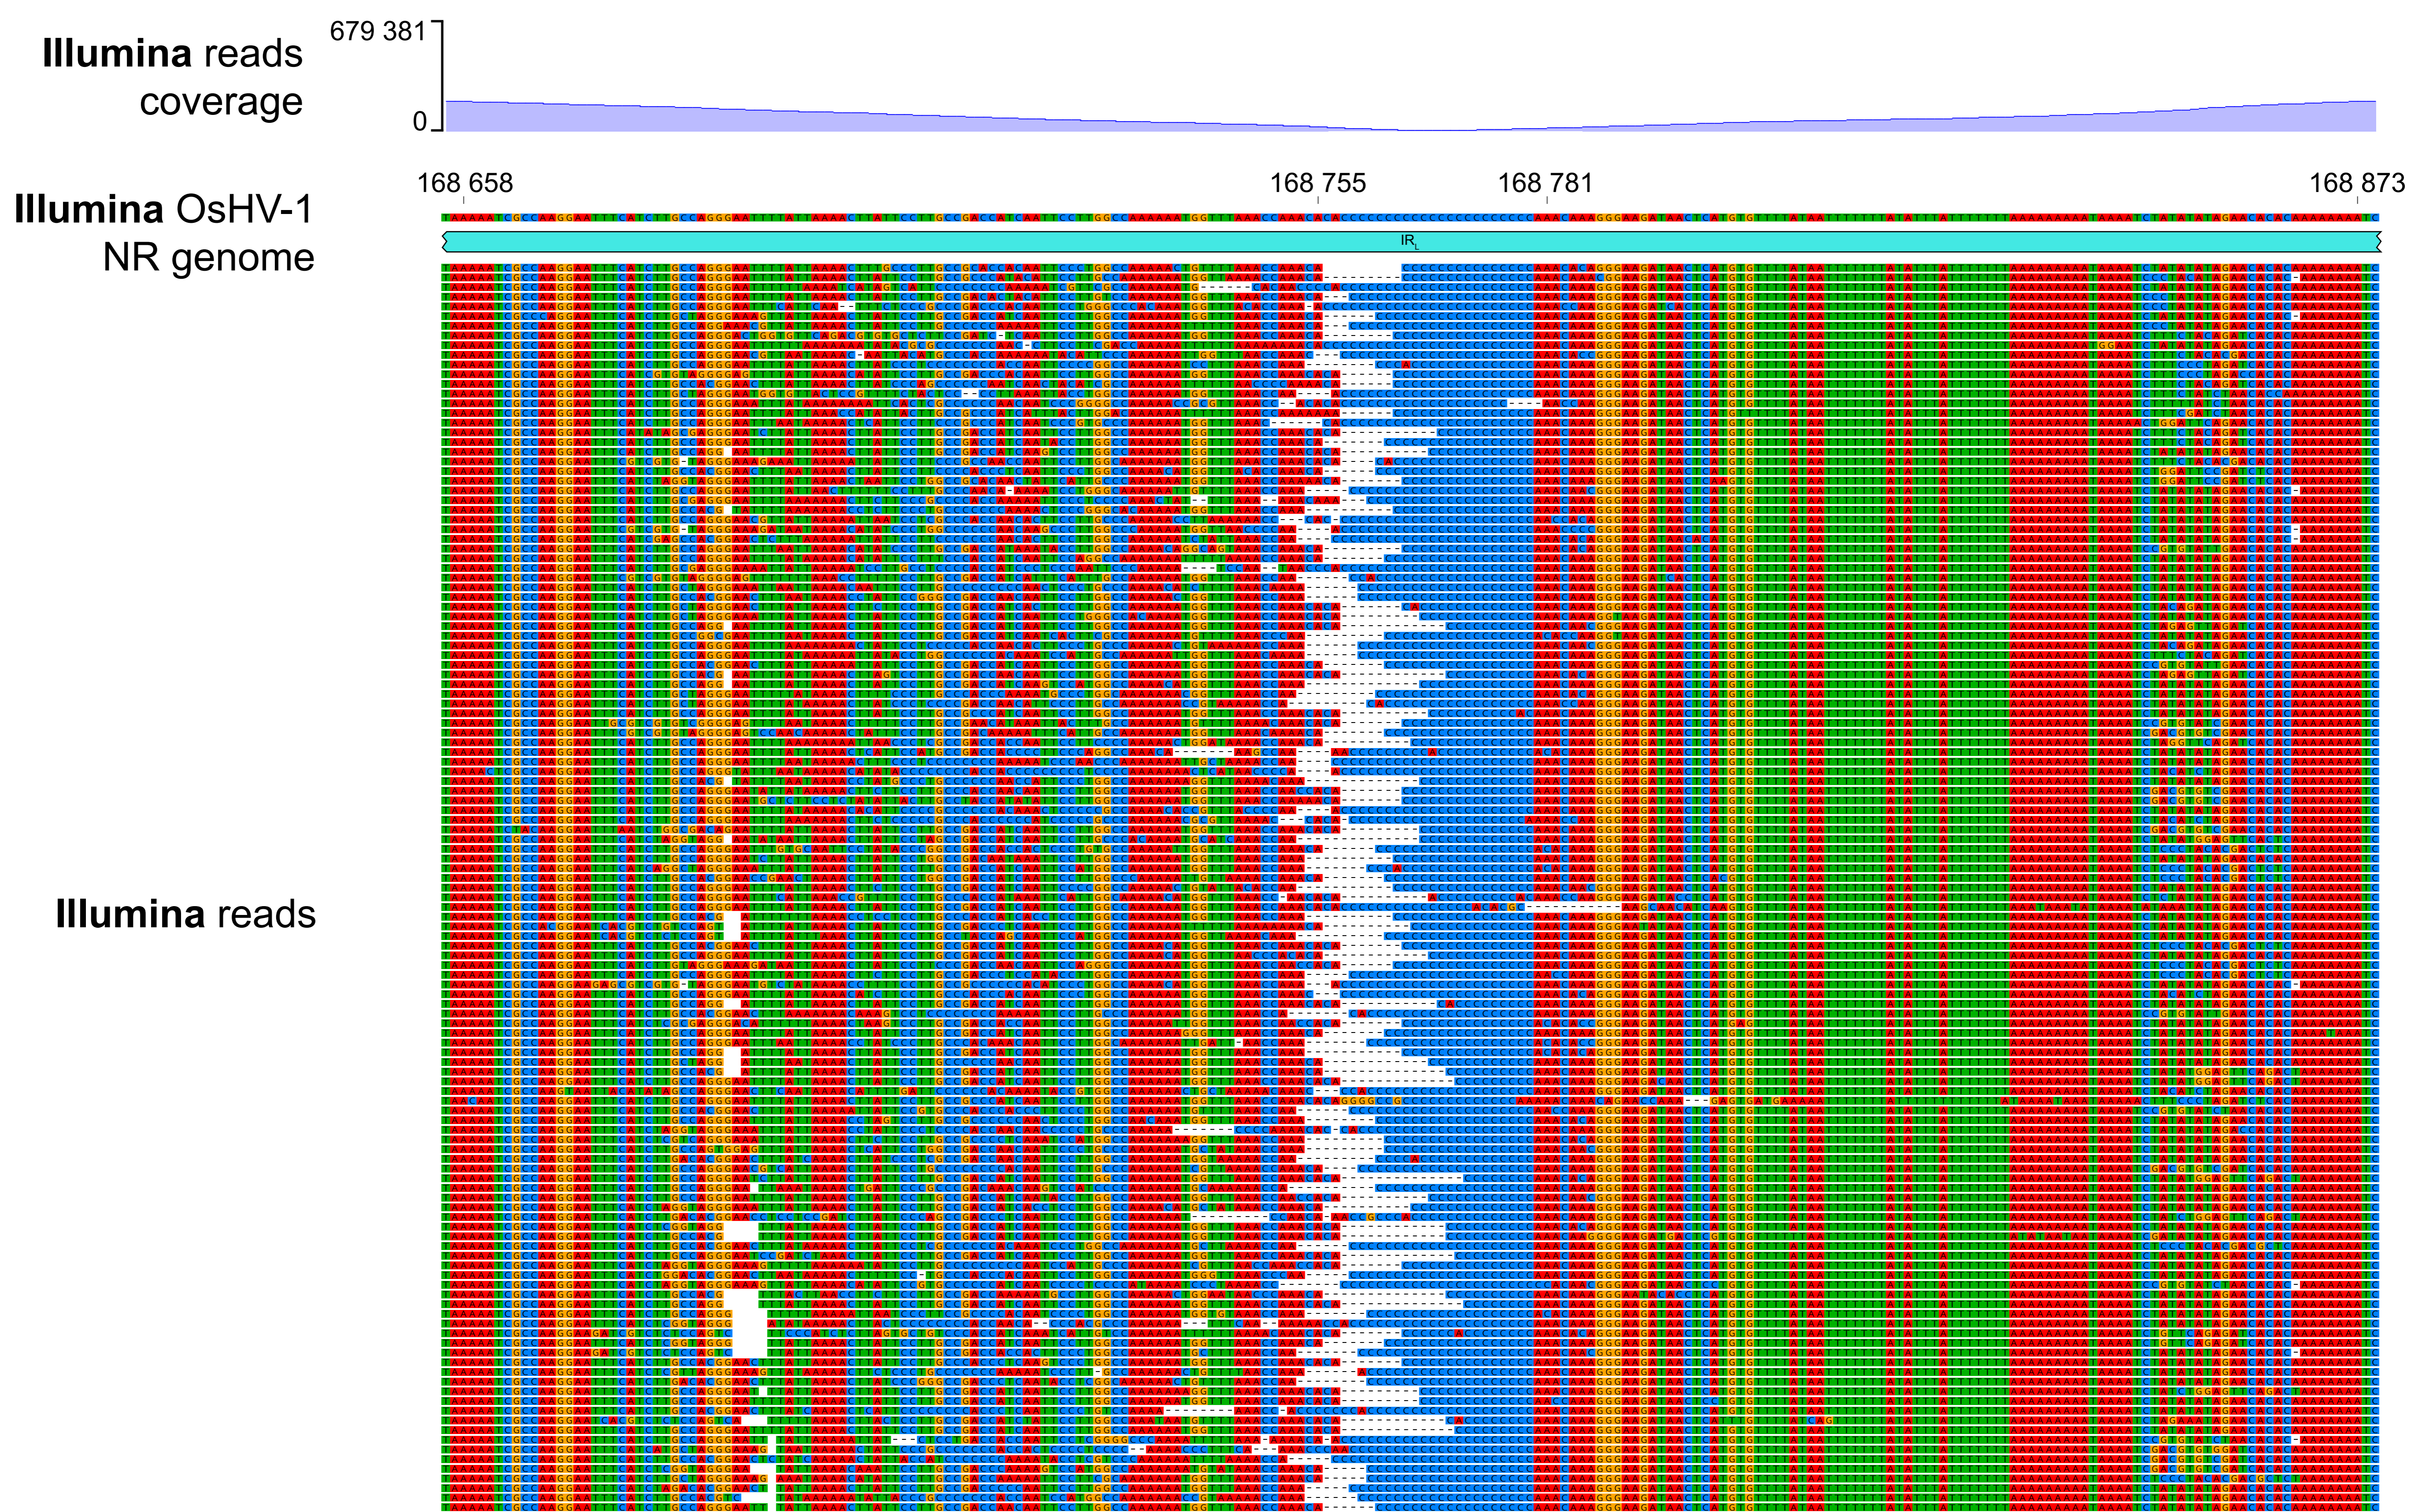

## B

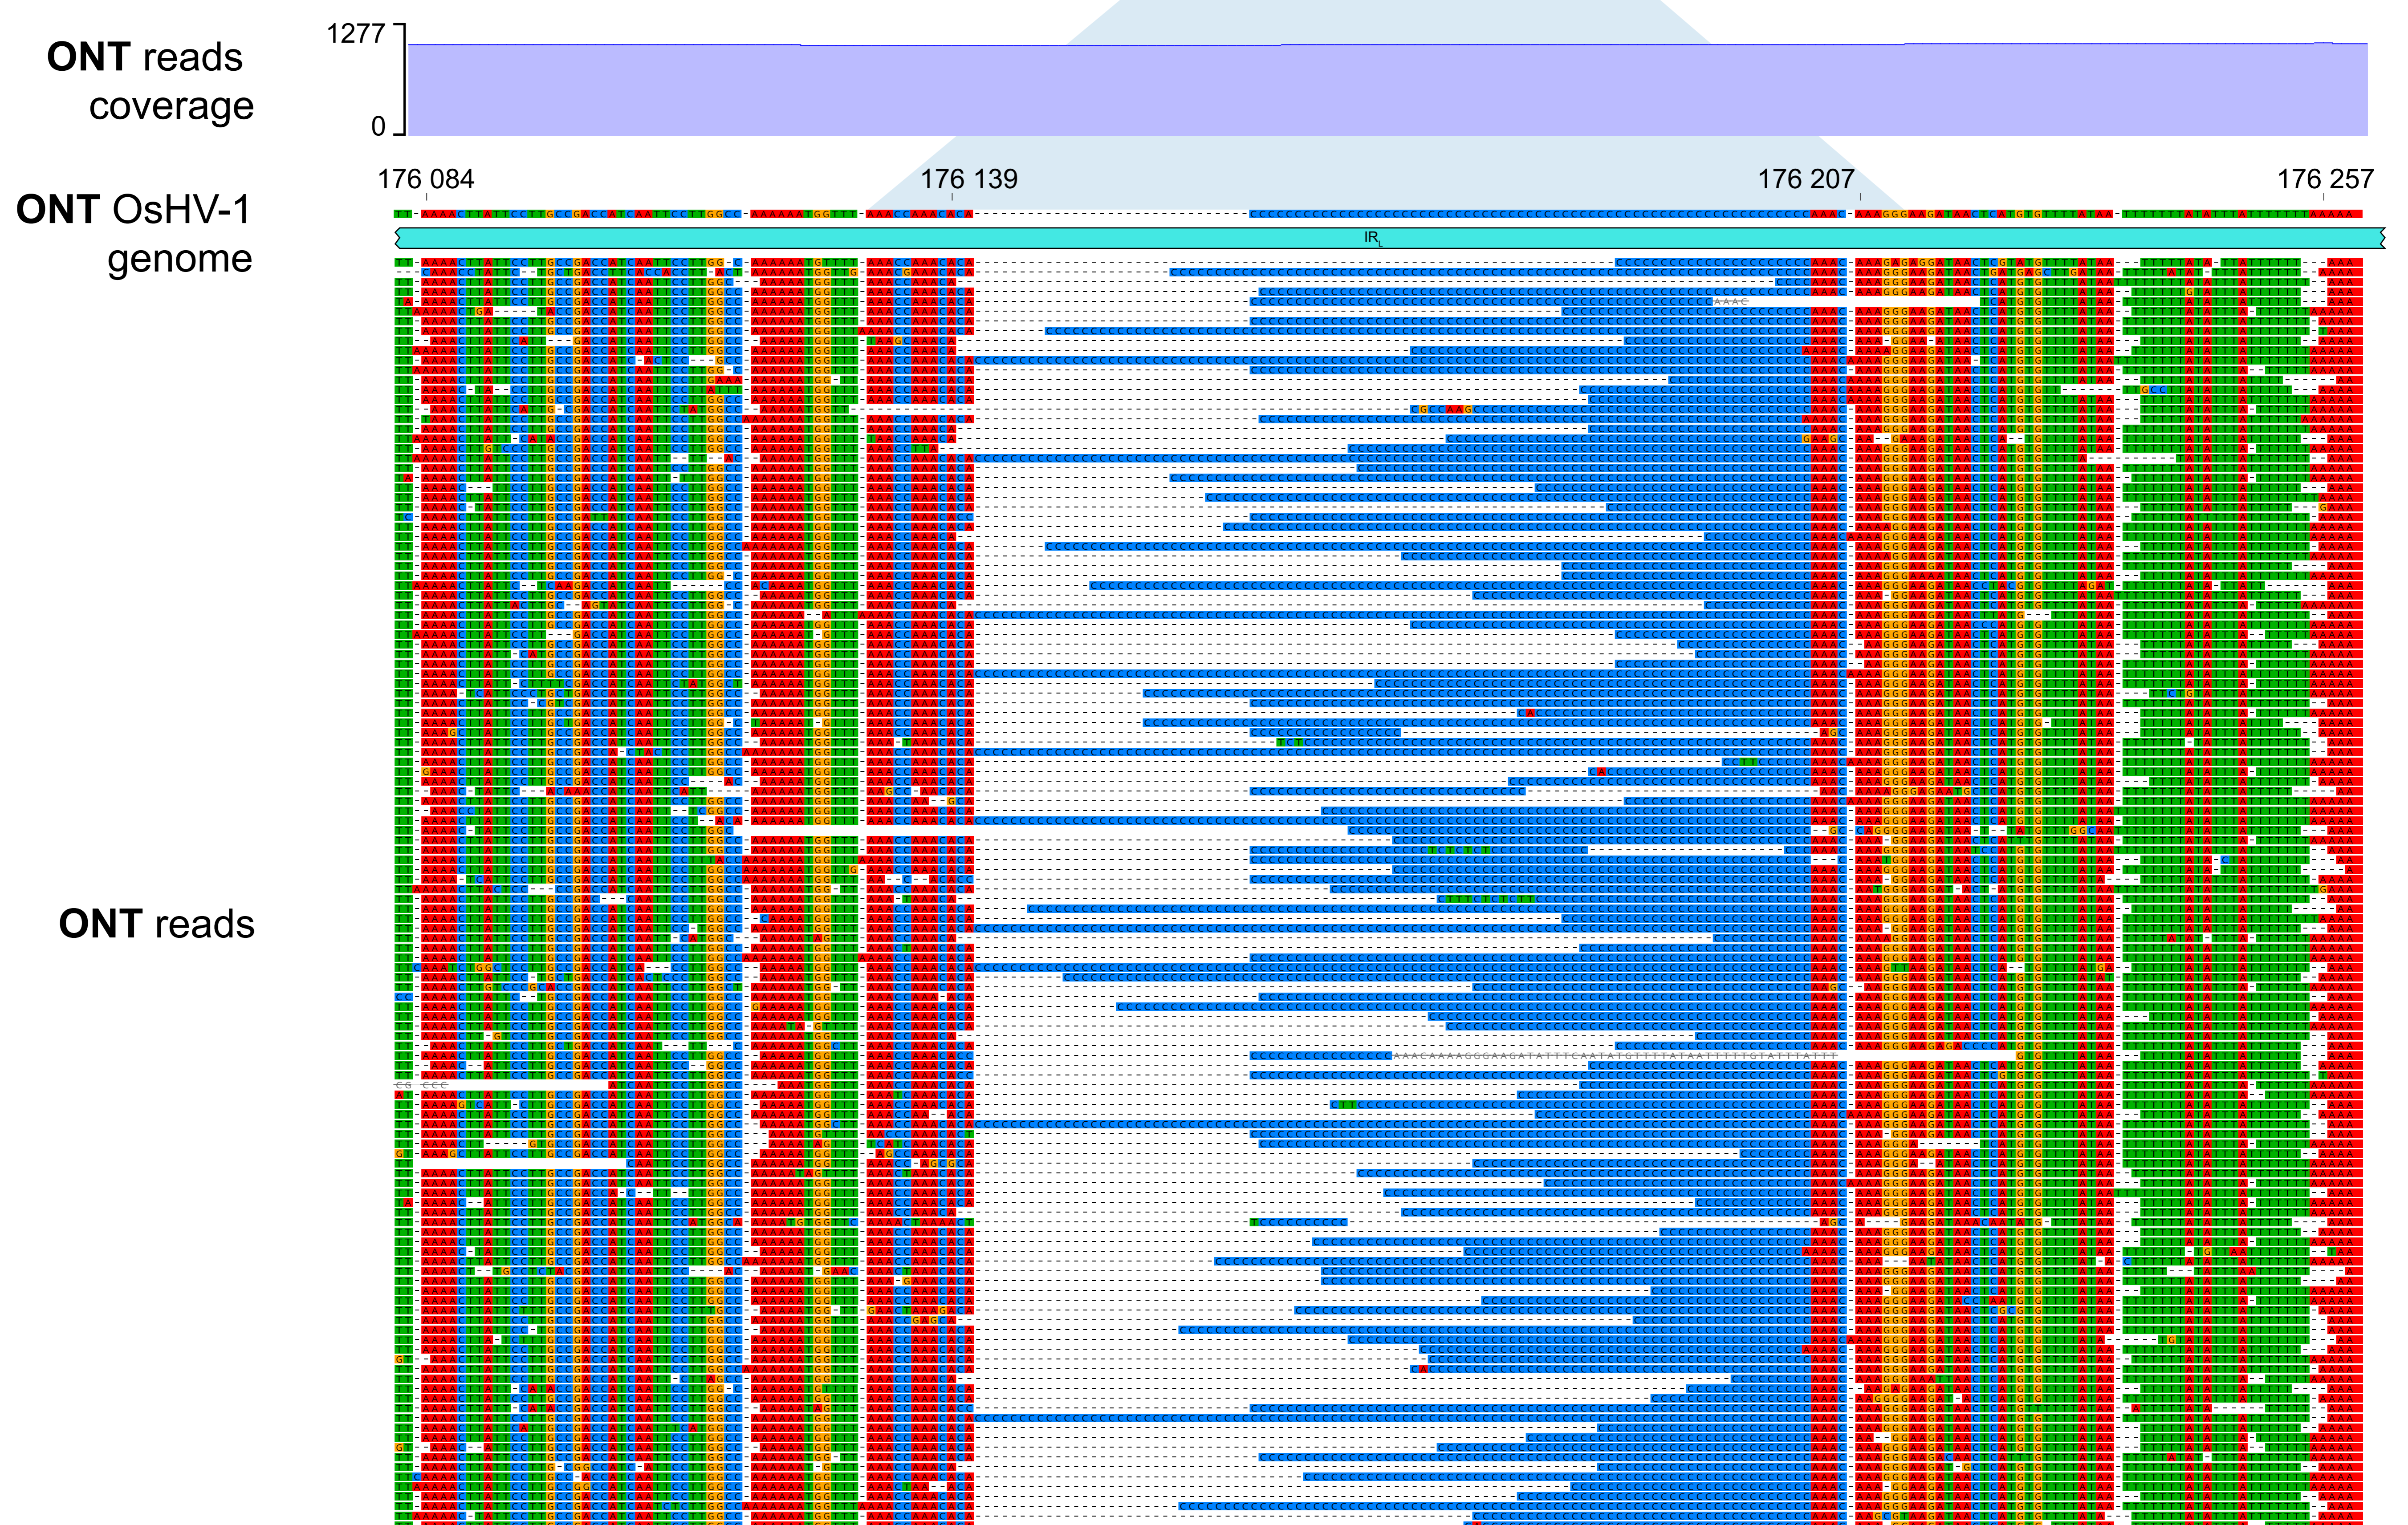

### Figure Suppl 2: Large homopolymer read analysis.

(A) Snapshot of Illumina short-read aligned in the large homopolymer in the IRL region of the Illumina OsHV-1 NR genome.

(B) Snapshot of ONT long-read aligned in the large homopolymer in the IRL region of the ONT OsHV-1 genome.

# Figure Suppl 3

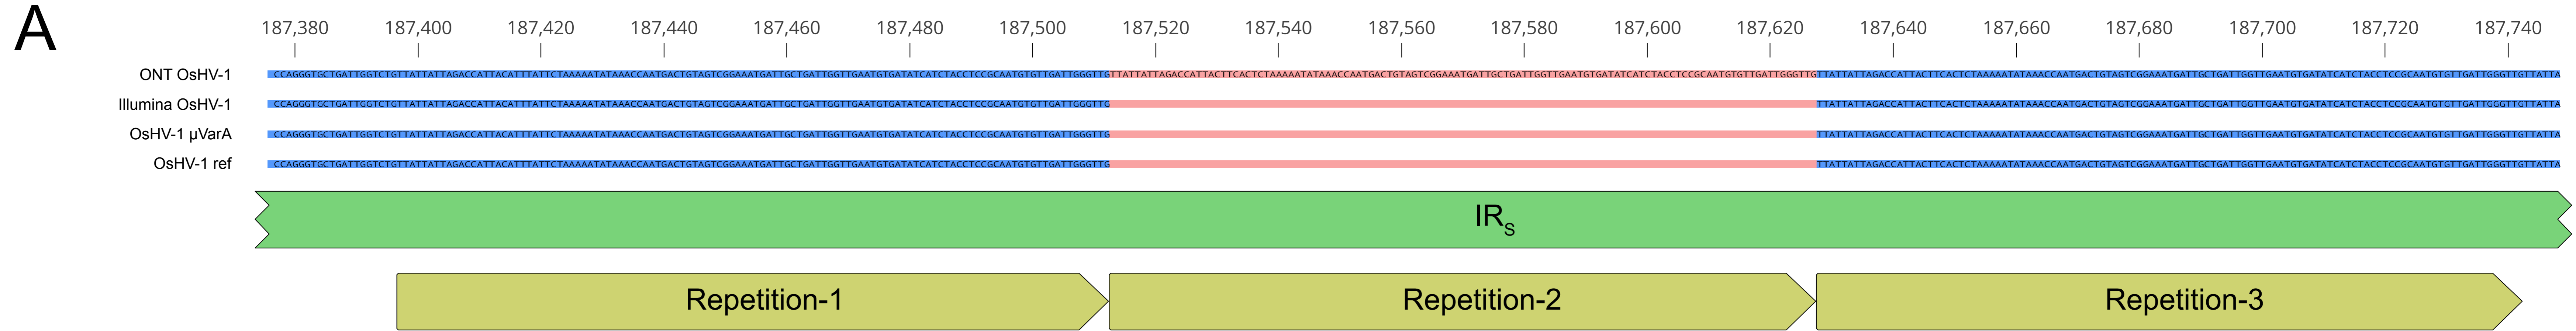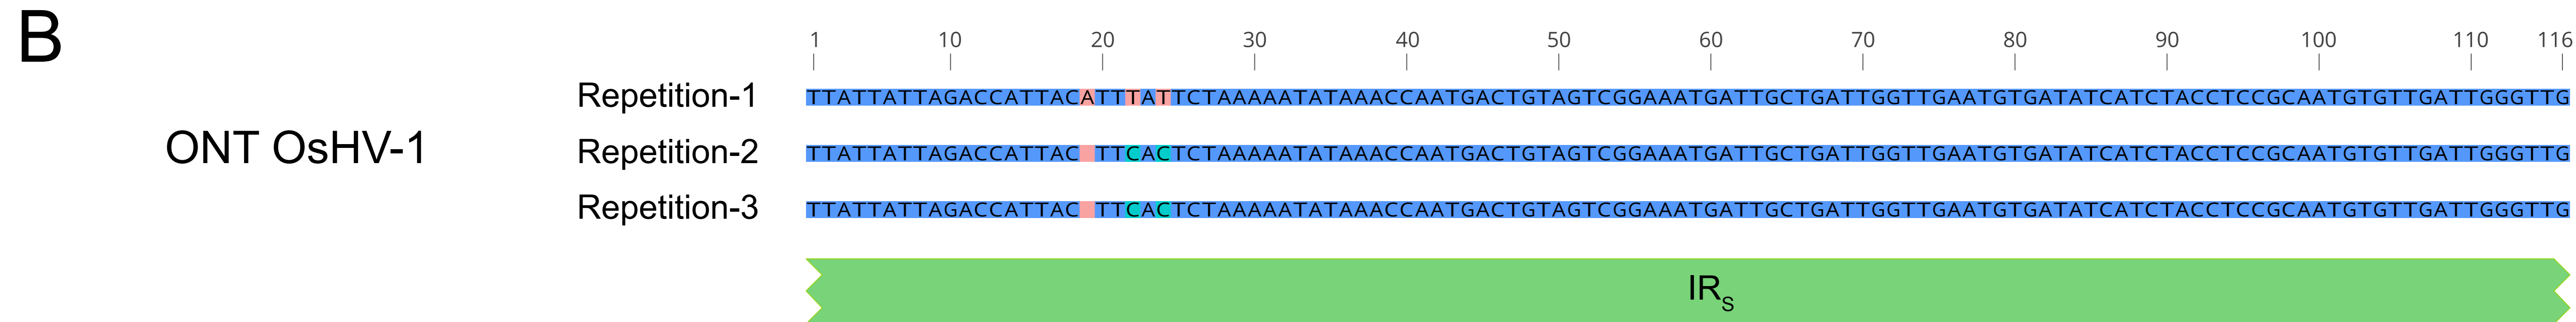

**Figure Suppl 3: Schematic representation of the 115 bp structural variation present in the IRS region.**

(A) Multiple alignment of the structural variation region from the 2005 OsHV-1 genome [7] the 2017 OsHV-1  $\mu$ Var A genome [31], the Illumina OsHV-1 NR genome and the ONT OsHV-1 genome. In red is highlighted the missing repetition.

(B) Multiple alignment of the three copies of the repetition.

**Table Suppl 1: Description of the methodologies used to date to sequence OshV-1 genomes.**

| Reference       | Strain                      | Genbank Accession     | Publication Date | Origin                                                                       | Host                  | Sampling Date | Tissue Type                                                               | Virus Isolation                                        | DNA Extraction                              | % virus DNA (reads)                                                                       | Amplification                                         | Sequencing Library                                         | Sequencing Technology                                           | Assembly Type                                                                                                                                                    |
|-----------------|-----------------------------|-----------------------|------------------|------------------------------------------------------------------------------|-----------------------|---------------|---------------------------------------------------------------------------|--------------------------------------------------------|---------------------------------------------|-------------------------------------------------------------------------------------------|-------------------------------------------------------|------------------------------------------------------------|-----------------------------------------------------------------|------------------------------------------------------------------------------------------------------------------------------------------------------------------|
| Davison et al.  | OshV-1 Ref                  | AY509253              | 2005             | France                                                                       | <i>C. gigas</i>       | 1992-1993     | Virions purified from infected <i>C. gigas</i> larvae                     | Ultra centrifugation + sucrose gradient                | Phenol-chloroform                           | 99%                                                                                       | /                                                     | M3mp19 library                                             | Sanger                                                          | GGG / Ptrans / BLAST / FastA / PRED-TMR2                                                                                                                         |
| Ren et al.      | AVNV                        | GQ153938              | 2013             | China                                                                        | <i>C. farreri</i>     | 2007          | Virions purified from infected <i>C. farreri</i>                          | Ultra centrifugation + sucrose gradient                | Takara MiniBEST DNA Extraction Kit Ver. 3.0 | no data                                                                                   | Tiling PCR based on 2005 genome                       | pGEM-T                                                     | Sanger                                                          | DNASTAR                                                                                                                                                          |
| Xia et al.      | OshV-1 SB                   | KP412538              | 2015             | China                                                                        | <i>S. broughtonii</i> | 2012          | Virions purified from infected <i>S. broughtonii</i>                      | Ultra centrifugation + sucrose gradient                | TIANampTM Marine Animals DNA Kit            | no data                                                                                   | Tiling PCR based on 2005 genome                       | pEASYTM-T5 Zero Cloning Vector                             | Sanger                                                          | DNASTAR 7.1                                                                                                                                                      |
| Buridi et al.   | OshV-1 μVar A and B         | KY242785 and KY271630 | 2017             | France and Ireland                                                           | <i>C. gigas</i>       | 2010          | Virions purified from infected <i>C. gigas</i> spat / minced spat tissues | Ultra centrifugation + sucrose gradient / no isolation | QIAamp DNA Mini kit                         | From ultracentrifugation + sucrose gradient = 1% to 66% (pPCR) / Tissue samples = no data | Pre-capture PCR for library enrichment                | SPRIworks HT Fragment library kit × 150 bp Mid Output kit. | illumina® NextSeq® 500 system with a 2 × 150 bp Mid Output kit. | Reference-based (2005 genome) Bowtie2 / Sambtools / MindTheGap                                                                                                   |
| Abbadati et al. | OshV-1 PT                   | MS561751              | 2018             | Italy                                                                        | <i>C. gigas</i>       | 2016          | Gills and mantle from infected <i>C. gigas</i>                            | no isolation                                           | QIAamp DNA Mini Kit                         | 2,60%                                                                                     | Sequencing library amplification + Gap closing by PCR | Nextera XT DNA sample preparation kit                      | illumina MiSeq + Sanger for finishing                           | Herpesvirales reads / denovo assembly IDBA-UD v1.1.1 / MUMmer v3.1 (2005 genome)                                                                                 |
| Bai et al.      | OshV-1 ZK0118               | MF509813              | 2019             | China                                                                        | <i>C. farreri</i>     | 2001          | Gills and mantle from infected <i>C. farreri</i>                          | no isolation                                           | QIAGEN DNeasy Blood and Tissue kit          | no data                                                                                   | Tiling LR-PCR based on 2005 genome                    | 9-13kb SMRTBell library / illumina TruSeq                  | PacBio RS II / illumina HiSeq 4000 / Sanger                     | PacBio: denovo Celera assembler + Quiver / illumina: denovo SOAPdenovo + gapclose                                                                                |
|                 | VW46-2-m                    |                       |                  | France, Charente-maritime                                                    | <i>C. gigas</i>       | 2017          |                                                                           |                                                        |                                             | 3,04%                                                                                     |                                                       |                                                            | HiSeq 4000, Paired-end 150bp                                    |                                                                                                                                                                  |
|                 | VW56-10-m                   |                       |                  | France, Charente-maritime                                                    | <i>C. gigas</i>       | 2017          |                                                                           |                                                        |                                             | 2,76%                                                                                     |                                                       |                                                            | HiSeq 4000, Paired-end 150bp                                    |                                                                                                                                                                  |
|                 | VW48-4-m                    |                       |                  | France, Charente-maritime                                                    | <i>C. gigas</i>       | 2017          |                                                                           |                                                        |                                             | 2,87%                                                                                     |                                                       |                                                            | HiSeq 4000, Paired-end 150bp                                    |                                                                                                                                                                  |
|                 | VW49-5-m88                  |                       |                  | France, Charente-maritime                                                    | <i>C. gigas</i>       | 2017          |                                                                           |                                                        |                                             | 1,92%                                                                                     |                                                       |                                                            | HiSeq 4000, Paired-end 150bp                                    |                                                                                                                                                                  |
|                 | VW58-12-m                   |                       |                  | France, Charente-maritime                                                    | <i>C. gigas</i>       | 2017          |                                                                           |                                                        |                                             | 1,19%                                                                                     |                                                       |                                                            | HiSeq 4000, Paired-end 150bp                                    |                                                                                                                                                                  |
|                 | VW47-3-m                    |                       |                  | France, Charente-maritime                                                    | <i>C. gigas</i>       | 2017          |                                                                           |                                                        |                                             | 3,19%                                                                                     |                                                       |                                                            | HiSeq 4000, Paired-end 150bp                                    |                                                                                                                                                                  |
|                 | VW57-11-m99                 |                       |                  | France, Charente-maritime                                                    | <i>C. gigas</i>       | 2017          |                                                                           |                                                        |                                             | 0,36%                                                                                     |                                                       |                                                            | HiSeq 4000, Paired-end 150bp                                    |                                                                                                                                                                  |
|                 | Posi-Harbour_UK_summer_2015 |                       |                  | United-Kingdom                                                               | <i>C. gigas</i>       | 2015          |                                                                           |                                                        |                                             | 3,53%                                                                                     |                                                       |                                                            | HiSeq 4000, Paired-end 150bp                                    |                                                                                                                                                                  |
|                 | LI                          |                       |                  | France, Charente-maritime                                                    | <i>C. gigas</i>       | 2010          |                                                                           |                                                        |                                             | 2,00%                                                                                     |                                                       |                                                            | HiSeq 2500, Paired-end 100bp                                    |                                                                                                                                                                  |
|                 | PR                          |                       |                  | France, Port en Bessin                                                       | <i>C. gigas</i>       | 2008          | Gills or mantle from infected spat-juveniles-                             | no isolation                                           | QIAamp DNA Mini Kit                         | 10,13%                                                                                    |                                                       |                                                            | HiSeq 2500, Single-end 100bp                                    |                                                                                                                                                                  |
|                 | MV                          | PRJNA721248           | 2021             | France, Charente-maritime                                                    | <i>C. gigas</i>       | 2010          | adults <i>C. gigas</i> or pool of larvae                                  |                                                        |                                             | 11,62%                                                                                    |                                                       |                                                            | HiSeq 2500, Single-end 100bp                                    | Reference mapping (2005 genome) BWA-MEM + consensus with bcftools and bedtools                                                                                   |
|                 | NZ                          |                       |                  | New-Zealand                                                                  | <i>C. gigas</i>       | 2010          |                                                                           |                                                        |                                             | 3,61%                                                                                     |                                                       |                                                            | HiSeq 2500, Single-end 100bp                                    |                                                                                                                                                                  |
|                 | NZ16                        |                       |                  | New-Zealand                                                                  | <i>C. gigas</i>       | 2011          |                                                                           |                                                        |                                             | 0,61%                                                                                     |                                                       |                                                            | HiSeq 2500, Paired-end 100bp                                    |                                                                                                                                                                  |
|                 | NZ17                        |                       |                  | New-Zealand                                                                  | <i>C. gigas</i>       | 2011          |                                                                           |                                                        |                                             | 0,88%                                                                                     |                                                       |                                                            | HiSeq 2500, Paired-end 100bp                                    |                                                                                                                                                                  |
|                 | NZ18                        |                       |                  | New-Zealand                                                                  | <i>C. gigas</i>       | 2011          |                                                                           |                                                        |                                             | 0,92%                                                                                     |                                                       |                                                            | HiSeq 2500, Paired-end 100bp                                    |                                                                                                                                                                  |
|                 | IRL15                       |                       |                  | Ireland                                                                      | <i>C. gigas</i>       | 2011          |                                                                           |                                                        |                                             | 0,01%                                                                                     |                                                       |                                                            | HiSeq 2500, Paired-end 100bp                                    |                                                                                                                                                                  |
|                 | JP2                         |                       |                  | Japan                                                                        | <i>C. gigas</i>       | na            |                                                                           |                                                        |                                             | 0,01%                                                                                     |                                                       |                                                            | HiSeq 2500, Paired-end 100bp                                    |                                                                                                                                                                  |
|                 | JP6                         |                       |                  | Japan                                                                        | <i>C. gigas</i>       | na            |                                                                           |                                                        |                                             | 0,01%                                                                                     |                                                       |                                                            | HiSeq 2500, Paired-end 100bp                                    |                                                                                                                                                                  |
|                 | NL4                         |                       |                  | Netherlands                                                                  | <i>C. gigas</i>       | na            |                                                                           |                                                        |                                             | 0,02%                                                                                     |                                                       |                                                            | HiSeq 2500, Paired-end 100bp                                    |                                                                                                                                                                  |
|                 | SP16                        |                       |                  | Spain                                                                        | <i>C. gigas</i>       | na            |                                                                           |                                                        |                                             | 0,01%                                                                                     |                                                       |                                                            | HiSeq 2500, Paired-end 100bp                                    |                                                                                                                                                                  |
|                 | SW3                         |                       |                  | Sweden                                                                       | <i>O. edulis</i>      | 2012          |                                                                           |                                                        |                                             | 0,01%                                                                                     |                                                       |                                                            | HiSeq 2500, Paired-end 100bp                                    |                                                                                                                                                                  |
|                 | SW6                         |                       |                  | Sweden                                                                       | <i>O. edulis</i>      | 2012          |                                                                           |                                                        |                                             | 2,12%                                                                                     |                                                       |                                                            | HiSeq 2500                                                      |                                                                                                                                                                  |
|                 | OshV-1 Br ind2              | OM811577              |                  |                                                                              |                       |               |                                                                           |                                                        |                                             | 1,85%                                                                                     |                                                       |                                                            |                                                                 |                                                                                                                                                                  |
|                 | OshV-1 Br ind4              | OM811578              |                  |                                                                              |                       |               |                                                                           |                                                        |                                             | 1,73%                                                                                     |                                                       |                                                            |                                                                 |                                                                                                                                                                  |
|                 | OshV-1 Br ind6              | OM811579              |                  | France, Bay of Brest (Br) (Logonna-Ouelias, lat.: 48.335 long.: -4.318)      |                       |               |                                                                           |                                                        |                                             | 1,09%                                                                                     |                                                       |                                                            |                                                                 |                                                                                                                                                                  |
|                 | OshV-1 Br ind9              | OM811580              |                  |                                                                              |                       |               |                                                                           |                                                        |                                             | 1,10%                                                                                     |                                                       |                                                            |                                                                 |                                                                                                                                                                  |
|                 | OshV-1 Br ind10             | OM811581              |                  |                                                                              |                       |               |                                                                           |                                                        |                                             | 3,19%                                                                                     |                                                       |                                                            |                                                                 |                                                                                                                                                                  |
|                 | OshV-1 MO ind1              | OM811582              |                  |                                                                              |                       |               |                                                                           |                                                        |                                             | 5,29%                                                                                     |                                                       |                                                            |                                                                 |                                                                                                                                                                  |
|                 | OshV-1 MO ind3              | OM811583              |                  |                                                                              |                       |               |                                                                           |                                                        |                                             | 0,66%                                                                                     |                                                       |                                                            |                                                                 |                                                                                                                                                                  |
|                 | OshV-1 MO ind4              | OM811584              |                  |                                                                              |                       |               |                                                                           |                                                        |                                             | 5,26%                                                                                     |                                                       |                                                            |                                                                 |                                                                                                                                                                  |
|                 | OshV-1 MO ind7              | OM811585              |                  | France, Marennes-Oléron Bay (MO) (La Flotte, lat.: 45.803 and long.: -1.153) |                       |               |                                                                           |                                                        |                                             | 2,77%                                                                                     |                                                       |                                                            |                                                                 |                                                                                                                                                                  |
|                 | OshV-1 MO ind8              | OM811586              |                  |                                                                              |                       |               |                                                                           |                                                        |                                             | 2,73%                                                                                     |                                                       |                                                            |                                                                 |                                                                                                                                                                  |
|                 | OshV-1 MO ind9              | OM811587              |                  |                                                                              |                       |               |                                                                           |                                                        |                                             | 5,91%                                                                                     |                                                       |                                                            |                                                                 |                                                                                                                                                                  |
|                 | OshV-1 MO ind10             | OM811588              |                  |                                                                              |                       |               |                                                                           |                                                        |                                             | 2,02%                                                                                     |                                                       |                                                            |                                                                 |                                                                                                                                                                  |
|                 | OshV-1 Th ind1              | OM811589              |                  |                                                                              |                       |               |                                                                           |                                                        |                                             | 3,10%                                                                                     |                                                       |                                                            |                                                                 |                                                                                                                                                                  |
|                 | OshV-1 Th ind3              | OM811590              |                  |                                                                              |                       |               |                                                                           |                                                        |                                             | 2,78%                                                                                     |                                                       |                                                            |                                                                 |                                                                                                                                                                  |
|                 | OshV-1 Th ind4              | OM811591              |                  |                                                                              |                       |               |                                                                           |                                                        |                                             | 2,85%                                                                                     |                                                       |                                                            |                                                                 |                                                                                                                                                                  |
|                 | OshV-1 Th ind5              | OM811592              |                  |                                                                              |                       |               |                                                                           |                                                        |                                             | 2,21%                                                                                     |                                                       |                                                            |                                                                 |                                                                                                                                                                  |
|                 | OshV-1 Th ind6              | OM811593              |                  |                                                                              |                       |               |                                                                           |                                                        |                                             | 4,30%                                                                                     |                                                       |                                                            |                                                                 |                                                                                                                                                                  |
|                 | OshV-1 Th ind7              | OM811594              |                  | France, Thau Lagoon (Th) (Meze, lat. 43.379 long. 3.571)                     |                       |               |                                                                           |                                                        |                                             | 9,88%                                                                                     |                                                       |                                                            |                                                                 |                                                                                                                                                                  |
|                 | OshV-1 Th ind8              | OM811595              |                  |                                                                              |                       |               |                                                                           |                                                        |                                             | 6,05%                                                                                     |                                                       |                                                            |                                                                 |                                                                                                                                                                  |
|                 | OshV-1 Th ind9              | OM811596              |                  |                                                                              |                       |               |                                                                           |                                                        |                                             | 4,05%                                                                                     |                                                       |                                                            |                                                                 |                                                                                                                                                                  |
|                 | OshV-1 Th ind10             | OM811597              |                  |                                                                              |                       |               |                                                                           |                                                        |                                             | 13,21%                                                                                    |                                                       |                                                            |                                                                 |                                                                                                                                                                  |
| Delmotte et al. |                             |                       | 2022             |                                                                              | <i>C. gigas</i>       | 2018          | Whole tissue from a single oyster spat                                    | no isolation                                           | MagAttract HMW DNA kit                      |                                                                                           |                                                       | Shotgun PCR-free library preparation kit                   | illumina NovaSeq 6000                                           | Viral read extraction with Kraken and <i>C. gigas</i> reference mapping / Denovo assembly with SPAdes / Scaffolding with SSPACE using OshV-1 μVar A as reference |

**Table Suppl 2A: Taxonomic classification of non-OsHV-1 contigs.** (A) Non-OsHV-1 contig identified in the ONT sequencing. Contig name in bold correspond to contigs also identified in the Illumina data.

| Flye                    |                     | Canu                   |                     | Read Coverage (Flye all reads) | Lenght  | GC%  | Tool    | Description                                                              | Accession   |
|-------------------------|---------------------|------------------------|---------------------|--------------------------------|---------|------|---------|--------------------------------------------------------------------------|-------------|
| Name (all reads) (n=24) | Name (top10%) (n=9) | Name (all reads) (n=4) | Name (top10%) (n=5) |                                |         |      |         |                                                                          |             |
| <b>Contig_01</b>        |                     |                        |                     | 6,4                            | 41 032  | 52,9 | PHASTER | Ralstonia phage RSK1 DNA                                                 | NC_022915.1 |
| <b>Contig_02</b>        | Contig_05           |                        |                     | 3,2                            | 39 124  | 33,6 | PHASTER | Flavobacterium phage FpV4                                                | NC_041872.1 |
| <b>Contig_03</b>        |                     |                        |                     | 7,1                            | 35 245  | 43,9 | PHASTER | Pseudomonas phage tf                                                     | NC_017971.2 |
| <b>Contig_04</b>        |                     |                        |                     | 11,8                           | 18 738  | 49,5 | PHASTER | Cellulophaga phage phi39:1                                               | NC_021804.1 |
| <b>Contig_05</b>        |                     |                        |                     | 4                              | 45 019  | 37,5 | PHASTER | Pseudoalteromonas phage B55                                              | NC_031917.1 |
| <b>Contig_06</b>        |                     |                        |                     | 5,1                            | 24 004  | 31,5 | BlastX  | Phage                                                                    |             |
| Contig_07               |                     |                        |                     | 4,7                            | 27 938  | 36,5 | BlastN  | Vibrio phage pVp-1                                                       | NC_019529.1 |
| <b>Contig_08</b>        |                     |                        |                     | 6,4                            | 29 804  | 31,7 | PHASTER | Persicivirga phage P12024L                                               | NC_018272.1 |
| Contig_09               |                     |                        |                     | 6,2                            | 27 288  | 48,1 | BlastN  | Vibrio phage 1.151.O_10N.222.46.B1                                       | MG592520.1  |
| <b>Contig_10</b>        |                     |                        |                     | 5,4                            | 25 934  | 47,5 | PHASTER | Lentibacter virus vB_LenP_ICBM2                                          | NC_048671.1 |
| <b>Contig_15</b>        |                     |                        |                     | 7,3                            | 32 985  | 34,9 | PHASTER | Cellulophaga phage phi38:1                                               | NC_021796.1 |
| Contig_16               |                     |                        |                     | 5,7                            | 28 718  | 39,9 | PHASTER | Flavobacterium phage vB_FspS_hemulen6-1                                  | NC_048833.1 |
| <b>Contig_17</b>        | Contig_06           | tig00000003            |                     | 65,4                           | 41 592  | 42   | PHASTER | Vibrio phage pYD21-A                                                     | NC_020846.1 |
| <b>Contig_18</b>        | Contig_04           |                        |                     | 9,9                            | 18 201  | 36,6 | BlastN  | C. gigas mitochondrial DNA                                               | AF177226.1  |
| Contig_19               | Contig_12           |                        |                     | 5                              | 64 902  | 67,5 | PHASTER | Gordonia phage Bachita                                                   | NC_030936.1 |
| <b>Contig_21</b>        |                     |                        |                     | 4,1                            | 35 292  | 44,8 | PHASTER | Pseudoalteromonas phage Pq0                                              | NC_029100.1 |
| Contig_22               |                     | tig00000001            |                     | 182,8                          | 14 374  | 37   | BlastN  | Eukaryotic Circular Rep-Encoding Single-Stranded DNA (CRESS DNA) Viruses | MH617489.1  |
| Contig_23               |                     |                        |                     | 3,6                            | 34 661  | 42,1 | BlastN  | Myoviridae sp. isolate ct2701                                            | BK025998.1  |
| Contig_25               | Contig_09           |                        |                     | 30,3                           | 59 544  | 44,6 | PHASTER | Vibrio phage douglas 12A4                                                | NC_021068.1 |
| <b>Contig_26</b>        | Contig_10           |                        |                     | 22,6                           | 163 592 | 33   | PHASTER | Bacteroides phage crAss001                                               | NC_049977.1 |
| <b>Contig_27</b>        | Contig_11           |                        |                     | 8,6                            | 51 757  | 47,8 | PHASTER | Vibrio phage VpKK5                                                       | NC_026610.2 |
| Contig_28               |                     |                        |                     | 4,9                            | 29 738  | 43,3 | BlastN  | Uncultured Caudovirales phage genome assembly                            | LR798326.1  |
